# Supplementary material
Source: Springer Nature journal article supplement (https://www.springermedizin.de/resource/supplementary/12887_2010_383_MOESM3_ESM.pdf/9474984)

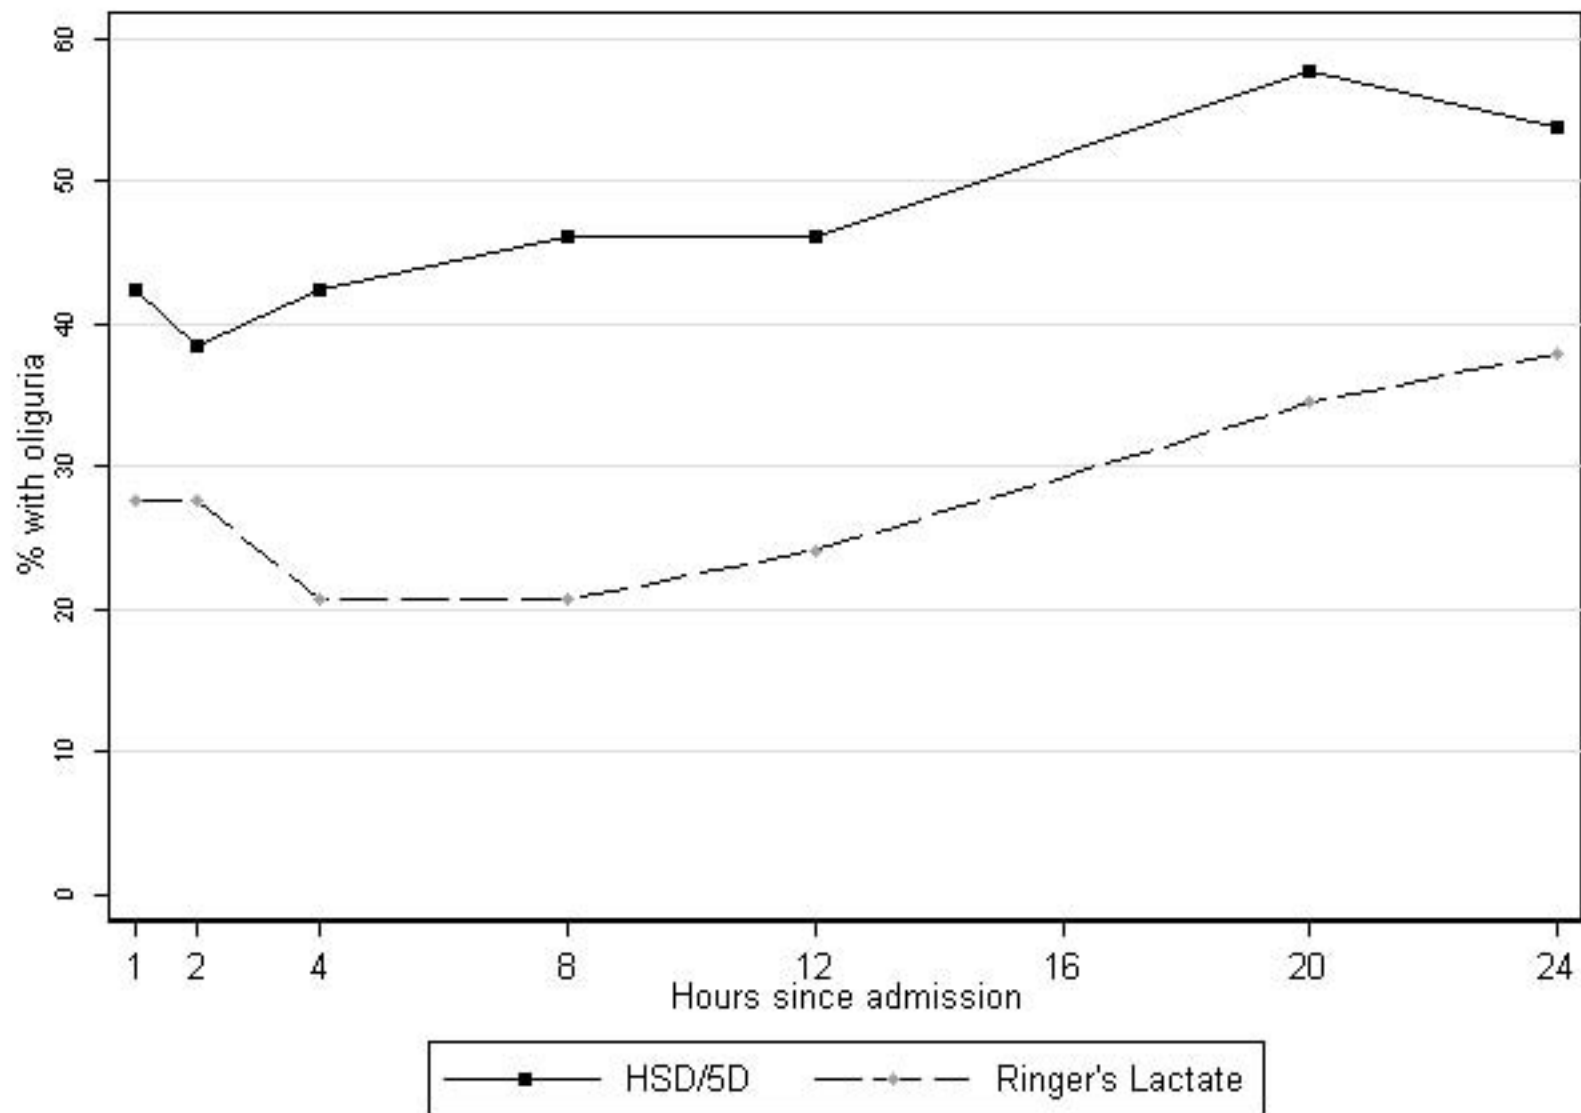

Supplement: MOESM3 [file 9474984]
